# Supplementary material
Source: Springer Nature journal article supplement (https://www.springermedizin.de/resource/supplementary/13058_2010_9527_MOESM1_ESM.pdf/9702350)
Supplement: MOESM1 [file 9702350]

Patients diagnosed with breast cancer in  
the period 1-1-2002 until 31-1-2009  
(n=3634)

- No CRP measurement (n=131)
- Men (n=23)
- *In situ* breast cancer (n=135)
- Surgery before blood sampling (n=137)
- CRP measurement >30 days before or after date of diagnosis (n=298)

Analysis of overall survival  
(n=2910)

- No information about recurrence (n=72)
- Recurrence <90 days after date of diagnosis (n=15)
- Distant metastases at diagnosis (n=40)

- Patients enrolled after 31-12-2008 (no information about cause of death after this date) (n=38)

Analysis of disease-free  
survival and recurrence  
(n=2783)

Analysis of death from  
breast cancer (n=2872)
